# Supplementary material for: Strong Be–Be bonds in double-aromatic bridged Be2(μ-SO) molecules
Source: Royal Society of Chemistry journal article supplement (doi:10.1039/d2dt01424f), 2022-01-01

## **SUPPORTING INFORMATION**

### **Strong Be-Be Bond in Double-Aromatic Bridged Be<sub>2</sub>(μ-SO) Molecule**

**F. Rezaie and S. Noorizadeh\***

**Chemistry Department, Faculty of Sciences, Shahid Chamran University of Ahvaz, Ahvaz,  
Iran**

---

\* noorizadeh\_s@scu.ac.ir

**Table S1.** Evaluated NBO charges ( $q$ ), charge separation in SO ( $\Delta q$ ) and Wiberg ( $W$ ) and Mayer ( $M$ ) bond indices of the SO, Be-S and Be-Be bond.

**Table S2.** Free energies ( $G$ ) and electronic energies ( $E$ ) of all dissociation products by different methods.

**Table S3.** Structures and coordinates of dissociation products at CCSD(T)/cc-pVTZ level of theory.

**Fig. S1.** Total NICS values and their  $zz$  components at a) center of the ring, b) 0.5 Å and c) 1.0 Å above the ring center at the MP2/cc-pVTZ level of theory.

**Table S1.** Evaluated NBO charges (q), charge separation in SO ( $\Delta q$ ) and Wiberg (W) and Mayer (M) bond indices of the SO, Be-S and Be-Be bond.

| <b>Moiety</b>                | <b>q(S)</b> | <b>q(O)</b> | <b>q(SO)</b> | <b><math>\Delta q(\text{SO})_s</math></b> | <b><math>W_{\text{S-O}}</math></b> | <b><math>M_{\text{S-O}}</math></b> | <b><math>W_{\text{Be-S}}</math></b> | <b><math>M_{\text{Be-S}}</math></b> | <b><math>W_{\text{Be-Be}}</math></b> | <b><math>M_{\text{Be-Be}}</math></b> |
|------------------------------|-------------|-------------|--------------|-------------------------------------------|------------------------------------|------------------------------------|-------------------------------------|-------------------------------------|--------------------------------------|--------------------------------------|
| SO                           | +0.634      | -0.634      | 0            | 1.268                                     | 1.247                              | 0.264                              |                                     |                                     |                                      |                                      |
| Be <sub>2</sub> ( $\mu$ -SO) | +0.279      | -0.880      | -0.601       | 1.159                                     | 1.035                              | 1.435                              | 0.855                               | 1.015                               | 0.837                                | 1.091                                |

**Table S2.** Free energies (G) and electronic energies (E) of all dissociation products by different methods. All values are in kcal.mol<sup>-1</sup>.

| Dissociation product         | G               |             |             | E               |              |              |
|------------------------------|-----------------|-------------|-------------|-----------------|--------------|--------------|
|                              | $\omega$ B97X-D | MP2         | CCSD(T)     | $\omega$ B97X-D | MP2          | CCSD(T)      |
| Be                           | -14.679273      | -14.614148  | -14.631529  | -14.6661701     | -14.6010452  | -14.618427   |
| O                            | -74.978502      | -74.862698  | -74.906510  | -74.964587      | -74.8487835  | -74.8925947  |
| S                            | -398.068133     | -397.573598 | -397.618715 | -398.0532375    | -397.5587018 | -397.6038195 |
| Be <sub>2</sub>              | -29.355042      | -29.223349  | -29.257615  | -29.3356631     | -29.2035378  | -29.2386696  |
| Be <sub>2</sub> <sup>+</sup> | -29.101001      | -28.966076  | -28.986324  | -29.08266       | -28.9477825  | -28.9680192  |
| BeSO                         | -488.065047     | -487.413265 | -487.460474 | -488.0442933    | -487.3930663 | -487.439163  |
| SO <sup>-</sup>              | -473.423961     | -472.810047 | -472.847527 | -473.4044642    | -472.791462  | -472.8279566 |
| SO(singlet)                  | -473.349838     | -472.760023 | -472.791090 | -473.331752     | -472.7414606 | -472.7726904 |
| SO(triplet)                  | -473.396265     | -472.797657 | -472.828867 | -473.3771377    | -472.7783666 | -472.8095875 |

**Table S3.** Structures and coordinates of dissociation products at CCSD(T)/cc-pVTZ level of theory.

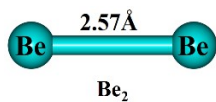

```
0 1
Be 0.00000000 0.00000000 1.26791300
Be 0.00000000 0.00000000 -1.26791300
```

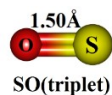

```
0 3
S 0.00000000 0.00000000 0.50022900
O 0.00000000 0.00000000 -1.00045800
```

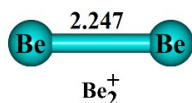

```
1 2
Be 0.00000000 0.00000000 1.12318700
Be 0.00000000 0.00000000 -1.12318700
```

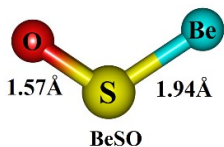

```
0 1
Be 1.88066800 -0.05060100 0.00000000
S 0.00000000 0.42763500 0.00000000
O -0.94033400 -0.82997000 0.00000000
```

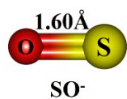

```
-1 2
S 0.00000000 0.00000000 0.53306100
O 0.00000000 0.00000000 -1.06612200
```

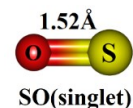

```
0 1
S 0.00000000 0.00000000 0.50478800
O 0.00000000 0.00000000 -1.00957600
```

**Fig. S1.** Total NICS values and their  $zz$  components at a) center of the ring, b)  $0.5\text{\AA}$  and c)  $1.0\text{\AA}$  above the ring center at the MP2/cc-pVTZ level of theory.

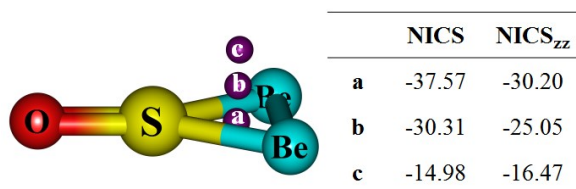

Supplement: d2dt01424f1.pdf [file d2dt01424f1.pdf]
